# Supplementary material
Source: publisher site journal article supplement (https://www.degruyter.com/publication/journal_key/SPMA/downloadAsset/SPMA_CFP_Frank_Hall.pdf)
Supplement: Supplementary file 1 [file SPMA_CFP_Frank_Hall.pdf]



# Special Issue in honor of Frank Hall

## GUEST EDITORS

---

- *Prof. Zhongshan Li*, Georgia State University, USA
- *Prof. Fuzhen Zhang*, Nova Southeastern University, USA
- *Prof. Tin-Yau Tam*, University of Nevada, Reno, USA
- *Prof. Bryan Shader*, University of Wyoming, USA
- *Prof. Marina Arav*, Georgia State University, USA
- *Prof. Hein van der Holst*, Georgia State University, USA

## DESCRIPTION

---

This Special Issue is dedicated to Prof. Frank J. Hall, in celebration of his great contributions to matrix theory research over the last 4 decades.

All contributions in the areas of matrix theory in which Prof. Frank Hall has made significant impact, such as generalized inverses, combinatorial matrix theory, integer matrices, sign pattern matrices, nonnegative matrices, consimilarity, spectral graph theory, and Gersgorin theory, are welcome.

## HOW TO SUBMIT

---

Before submission authors should carefully read the [Instructions for Authors](#).

All submissions to the Special Issue must be made electronically via the Editorial Manager: [www.editorialmanager.com/spma](http://www.editorialmanager.com/spma)

All manuscripts will undergo the standard peer-review process (single blind, at least two independent reviewers).

Submission of a manuscript implies that the work described has not been published before as a whole or as a part in any medium by the authors or anyone else, and it is not under consideration for publication elsewhere.

The deadline for submissions is **December 20th, 2023**.
